# Supplementary material
Source: publisher figshare collection journal article supplement (https://acs.figshare.com/ndownloader/files/17968814)
Supplement: Supplementary file 1 [file 17968814]

**Supplementary information for**

**Biocatalytic fabrication of  $\alpha$ -glucan-coated porous starch granules by  
amylolytic and glucan-synthesizing enzymes as a target-specific delivery  
carrier**

Yi-Seul Jung<sup>†,‡</sup>, Moon-Gi Hong<sup>‡,‡</sup>, Se-Hee Park<sup>†</sup>, Byung-Hoo Lee<sup>‡,\*</sup>, Sang-Ho Yoo<sup>†,\*</sup>

<sup>†</sup>Department of Food Science & Biotechnology and Carbohydrate Bioproduct Research Center,  
Sejong University, Seoul 05006, Republic of Korea

<sup>‡</sup>Department of Food Science & Biotechnology, Gachon University, Seongnam 13120,  
Republic of Korea

<sup>#</sup>These authors contributed equally

\*Corresponding authors:

Byung-Hoo Lee (Tel.: +82 31-750-5405, e-mail address: blee@gachon.ac.kr)

Sang-Ho Yoo (Tel.: +82 2-3408-3221, e-mail address: shyoo@sejong.ac.kr)

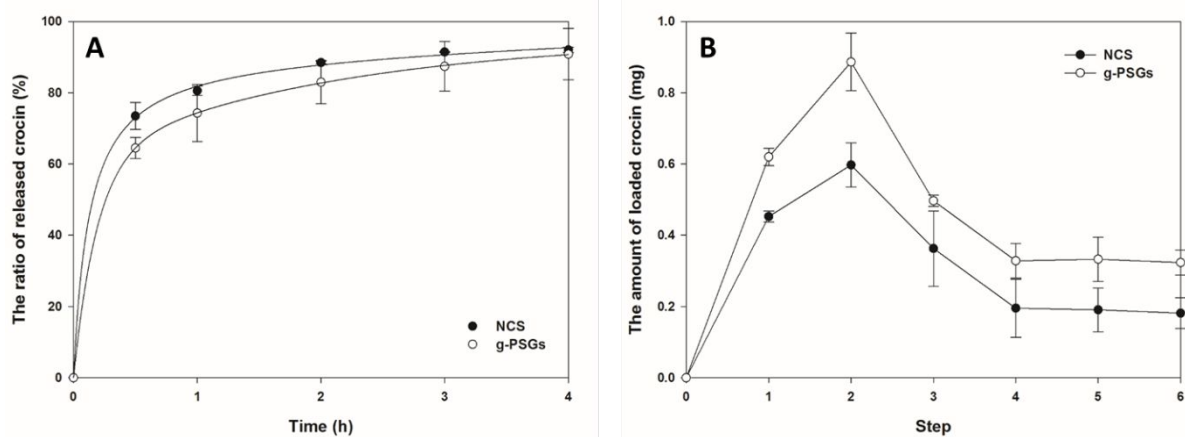

**Figure S1. Release patterns of the loaded crocin from the porous starch granules produced by glucoamylase (g-PSGs) and normal corn starch (NCS) by the immersion treatment in aqueous solution over soaking time (A). Preservative effect by the g-PSGs and NCS on the loaded crocin due to the formation of the  $\alpha$ -glucan coating via elongation reaction by *NpAS* in each step (B) (0-1, loading step; 1-2, surface coating step; 2-3, washing step; 3-6, releasing step over soaking time).**
